# Supplementary material for: Dissecting protein architecture with communication blocks and communicating segment pairs
Source: PubMed Central journal article supplement (PMC4959365; doi:10.1186/s12859-015-0855-y), 2016-01-20

# Supplementary Materials

|                                                | Protein A | P53      | KIT WT   | KIT MU   |
|------------------------------------------------|-----------|----------|----------|----------|
| Total charge of counter-ions                   | +2        | -3       | +1       | 0        |
| Water box dimensions ( $\text{\AA}^3$ )        | 75x49x49  | 76x73x64 | 77x73x81 | 77x73x81 |
| Number of water molecules                      | 4 174     | 8 215    | 13 195   | 13 197   |
| Total number of atoms                          | 13 477    | 27 755   | 44 870   | 44 879   |
| Deviation after equilibration ( $\text{\AA}$ ) | 0.83      | 0.65     | 1.29     | 1.13     |

**Table S1** MD preparation and equilibration details. The counter-ions employed to neutralize the systems are  $\text{Na}^+$  and  $\text{Cl}^-$ . Root mean square deviations were computed on the backbone atoms of the equilibrated conformations versus the initial template.

|                           | Protein A |     | P53 |     | KIT WT |     | KIT MU |     |
|---------------------------|-----------|-----|-----|-----|--------|-----|--------|-----|
| Replicate                 | 1         | 2   | 1   | 2   | 1      | 2   | 1      | 2   |
| Cutoff ( $\text{\AA}$ )   | 1.5       | 2.2 | 2.3 | 2.3 | 2.5    | 2.5 | 2.5    | 2.5 |
| # reference conformations | 2-3       | 2-6 | 2-4 | 2-5 | 4-7    | 5-7 | 2-4    | 5-6 |
| Convergence criterion $c$ | 0.9       | 0.8 | 0.9 | 0.9 | 0.6    | 0.4 | 0.7    | 0.6 |

**Table S2** Convergence analysis of the two MD replicates of each studied system. The analysis was applied 5 times on the last 30 ns of every productive run. The convergence criterion  $c$  was calculated as described in Methods.

|                  | pathway-based CB |            |            |            |            | clique-based CB |
|------------------|------------------|------------|------------|------------|------------|-----------------|
|                  | $l \geq 4$       | $l \geq 5$ | $l \geq 6$ | $l \geq 7$ | $l \geq 8$ | All             |
| <b>P53</b>       |                  |            |            |            |            |                 |
| all              | 1                | 1          | 1          | 1          | 1          | 5               |
| sim1             | 3 (55)           | 3 (61)     | 1 (84)     | 1 (75)     | 1 (88)     | 8 (78)          |
| sim2             | 1 (95)           | 1 (82)     | 1 (87)     | 1 (80)     | 1 (59)     | 8 (91)          |
| <b>Protein A</b> |                  |            |            |            |            |                 |
| all              | 1                | 1          | 1          | 1          | 1          | 2               |
| sim1             | 1 (100)          | 1 (100)    | 1 (98)     | 1 (100)    | 1 (98)     | 2 (100)         |
| sim2             | 1 (88)           | 1 (82)     | 1 (82)     | 1 (80)     | 1 (78)     | 2 (88)          |
| <b>KIT WT</b>    |                  |            |            |            |            |                 |
| all              | 3                | 1          | 1          | 1          | 1          | 7               |
| sim1             | 3 (94)           | 1 (93)     | 1 (88)     | 1 (96)     | 1 (96)     | 6 (76)          |
| sim2             | 2 (92)           | 1 (95)     | 2 (90)     | 1 (87)     | 1 (80)     | 6 (58)          |
| <b>KIT MU</b>    |                  |            |            |            |            |                 |
| all              | 1                | 2          | 3          | 2          | 2          | 5               |
| sim1             | 2 (76)           | 2 (70)     | 2 (31)     | 1 (52)     | 1 (51)     | 5 (90)          |
| sim2             | 1 (96)           | 2 (94)     | 3 (90)     | 2 (98)     | 2 (100)    | 6 (68)          |

**Table S3** Reproducibility of communication blocks over the MD replicates of each studied system. The numbers of pathway-based and clique-based communication blocks (CBs) identified by COMMA when applied to the whole conformational ensemble and to the individual MD trajectories are indicated. For pathway-based CBs, different minimum pathway lengths  $l$  (in residues) are considered. The overlap (in percentages of residues) between the CBs identified from the first (resp. second) MD replicate and those identified from the whole conformational ensemble are indicated in parentheses.

|       | all | sim1 | sim2 |
|-------|-----|------|------|
| H1-H2 | 0.5 | 0.1  | 0.3  |
| H1-H3 | 1.1 | 1    | 0.3  |
| H2-H3 | 4.1 | 4.1  | 2.6  |

**Table S4** Reproducibility of communication strengths between secondary structure elements (SSEs) in Protein A. The communication strengths (computed as the product of the proportions of residues involved in communication pathways linking the two segments multiplied by the number of pairs of residues directly linked by a pathway, see Methods) between pairs of helices (H1, H2, H3) are reported for the whole conformational ensemble and for each individual replicate. The order of communication strengths is the same in the three analyses.

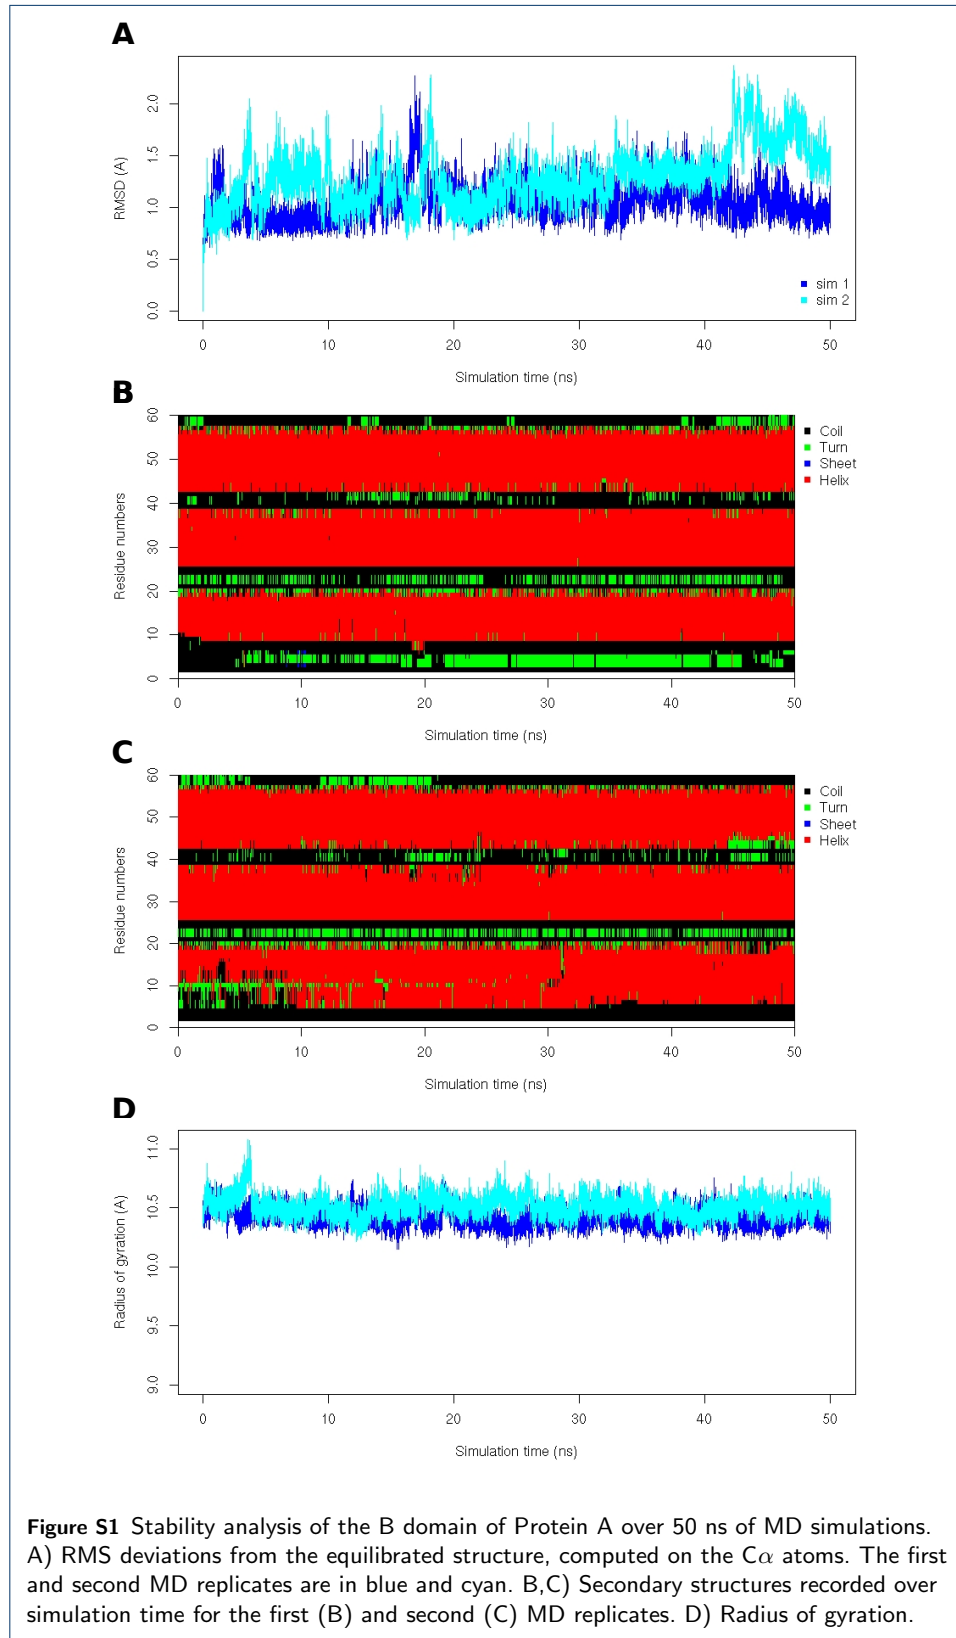

**Figure S1** Stability analysis of the B domain of Protein A over 50 ns of MD simulations. A) RMS deviations from the equilibrated structure, computed on the  $C\alpha$  atoms. The first and second MD replicates are in blue and cyan. B,C) Secondary structures recorded over simulation time for the first (B) and second (C) MD replicates. D) Radius of gyration.

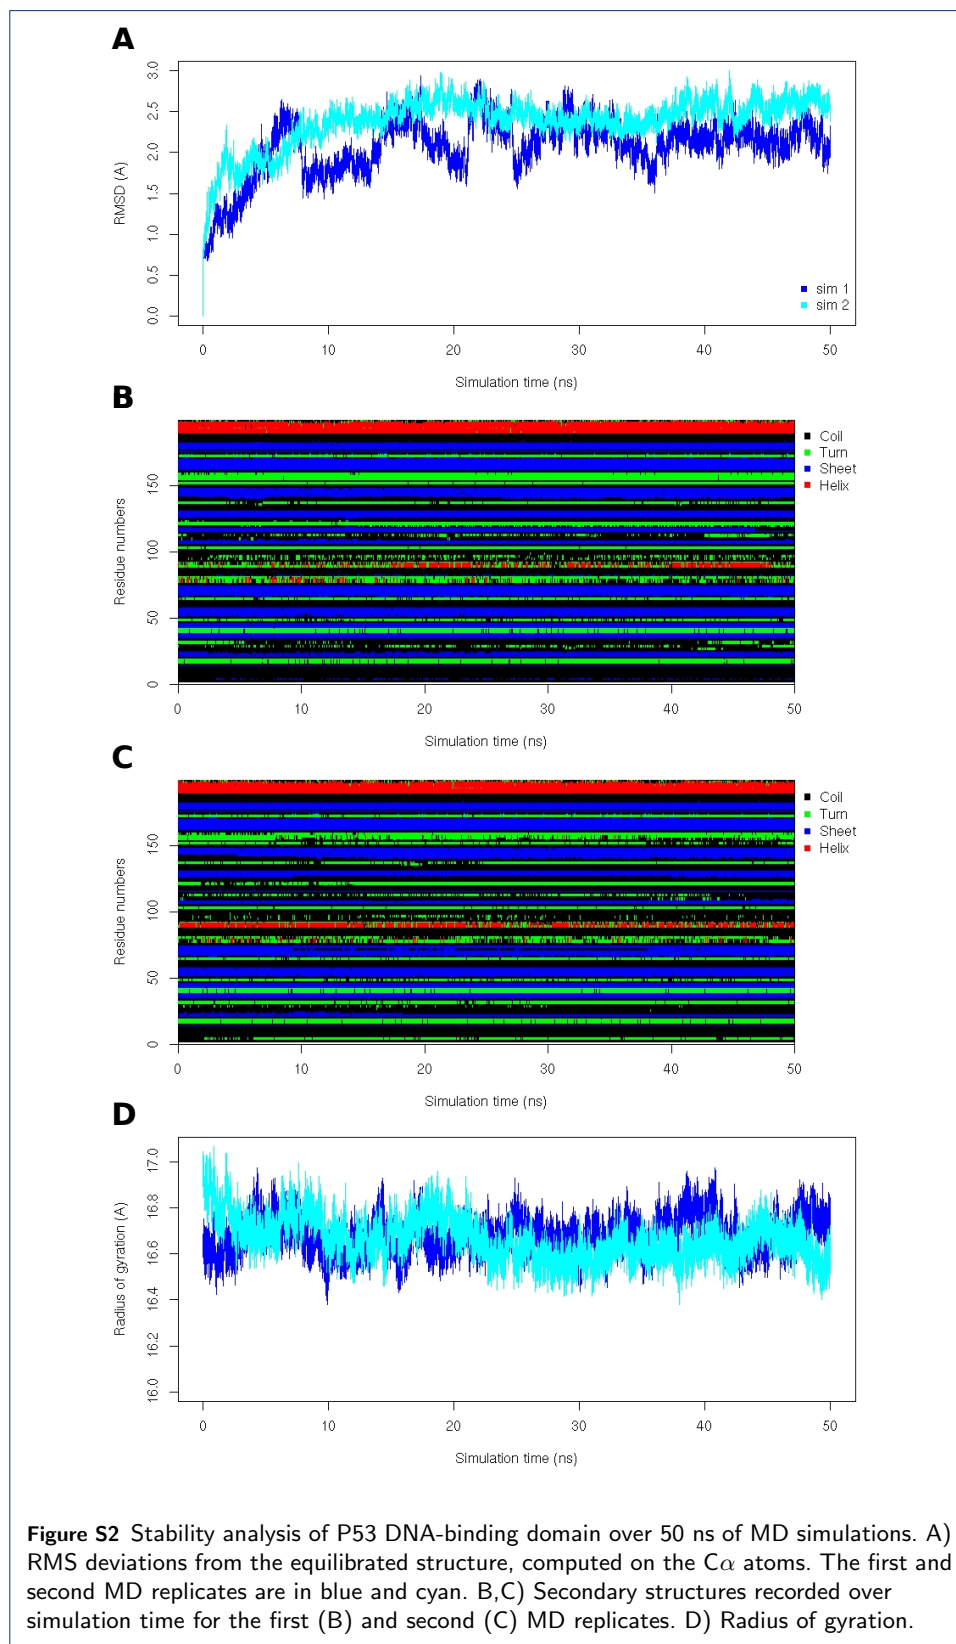

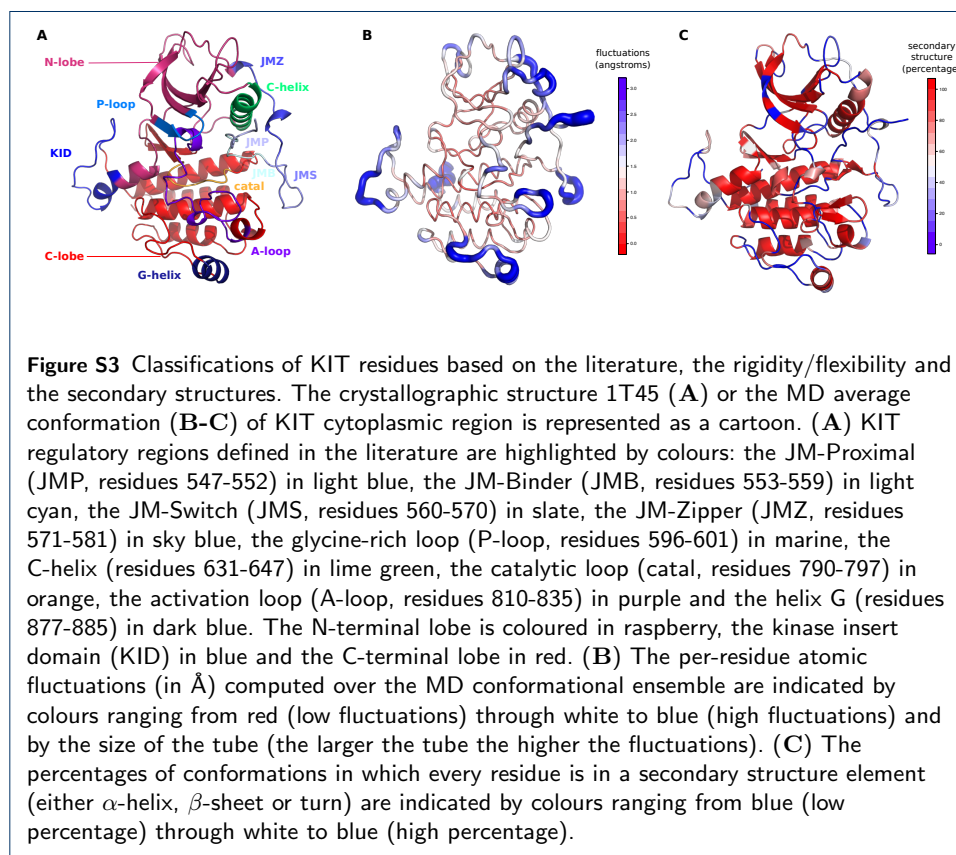

Supplement: 12859_2015_855_MOESM1_ESM.pdf [file 12859_2015_855_MOESM1_ESM.pdf]
